# Supplementary material
Source: publisher figshare collection journal article supplement (https://gsajournals.figshare.com/ndownloader/files/29157480)
Supplement: Supplementary file 1 [file 29157480]

Table S8. Primer sequences used for ddRAD-seq copy number estimation,
Target,Primer Sequence
Slx/Slxl1 F,AATCAGAAAACGTAAGTTTCTCAGAGG
Slx/Slxl1 R,TTGCTGTTCACCACTTAACAAATTC
Sly F,AGAGAAAATGGATGGAAACTTATGTCAAAGA
Sly R,CTCTCGTTCGTTCGTTTTGCA
RPP30 F,TCTGTCCTTACCCACTCCTATC
RPP30 R,CTGGCATACGGCTTACATCTC
